# Supplementary material for: Repelling hot water from superhydrophobic surfaces based on carbon nanotubes
Source: Royal Society of Chemistry journal article supplement (doi:10.1039/c5ta05231a), 2015-01-01
Supplement: c5ta05231a2.pdf [file c5ta05231a2.pdf]

Supporting information for:

## Repelling hot water from superhydrophobic surfaces based on carbon nanotubes

Fang Wan<sup>a</sup>, De-Quan Yang<sup>a\*</sup> and Edward Sacher<sup>b</sup>

<sup>a</sup>*Materials Research Lab., Wuxi Shunye Technology Co., Ltd., 29 Lianze Road, Shanshui Cheng Tech. Park, Suite 15, Binhu District, Wuxi, Jiangsu, 214125, China*

<sup>b</sup>*Regroupement Québécois de Matériaux de Pointe, Department of Engineering Physics, École Polytechnique de Montréal, Case Postale 6079, succursale Centre-Ville, Montréal, Québec H3C 3A7, Canada*

\* Correspondence author should be addressed to: De-Quan Yang, Email. [dequan.yang@gmail.com](mailto:dequan.yang@gmail.com), Tel. +86-510-6668-5886, Fax. +86-510-6668-5882

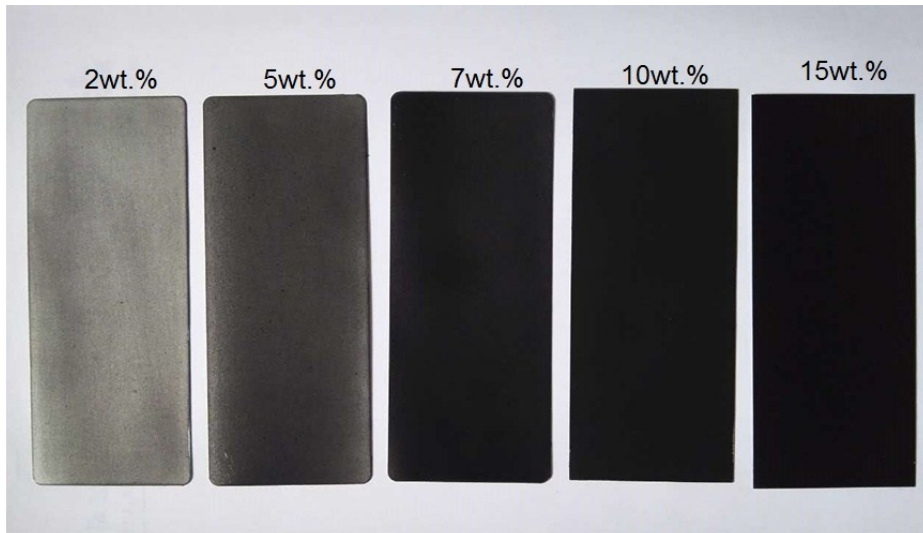

Figure S1 Photograph of the CNTs-OS composite coatings surface as a function of CNT concentration on tinplate.

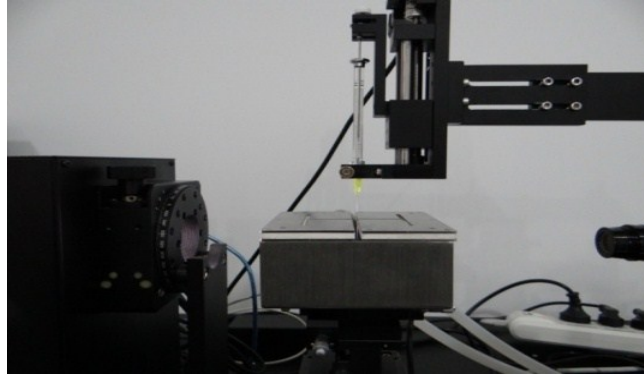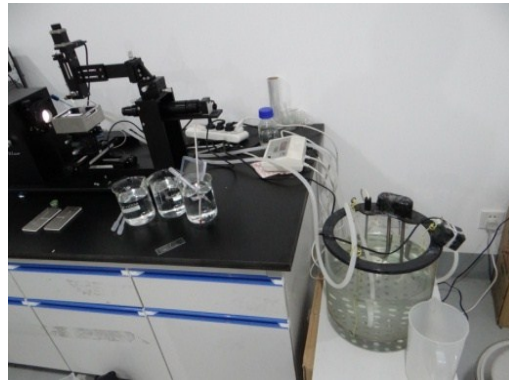

Figure S2. Water contact angle measurement instrument setup

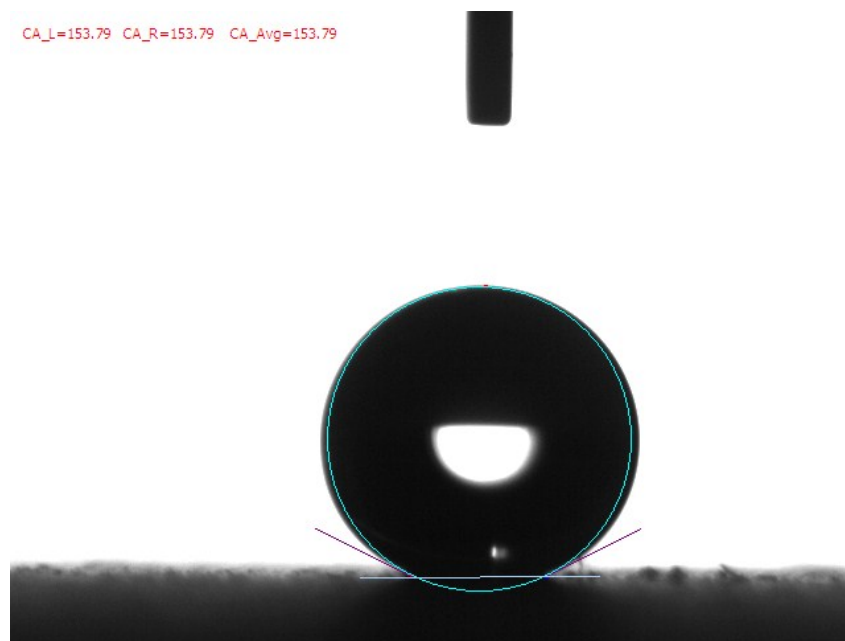

Figure S3 A photograph of SLB2000 with program-fitted water contact angle

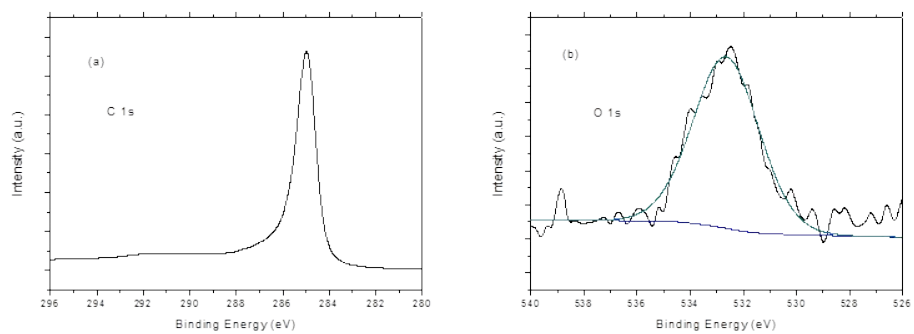

Figure S4 XPS spectra of sample 1, (a) C1s, (b) O1s

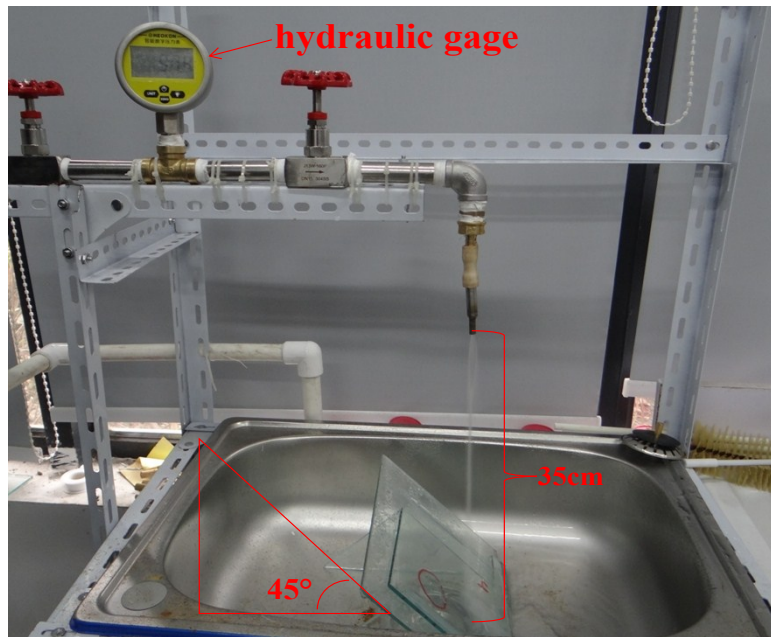

Figure S5 Photograph of experimental setup for a waterfall/jet test

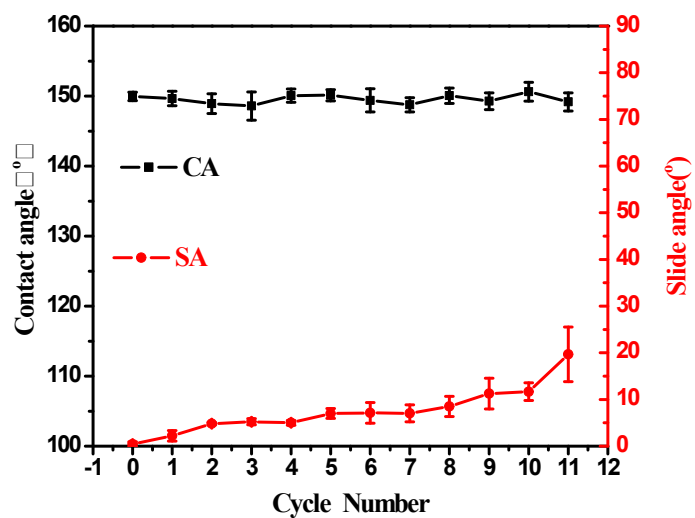

Figure S6 The CA and SA durability test results of an Ultra-Ever Dry superhydrophobic film, as a function of the number of abrasion cycles. The abrasion resistance condition is described in the text.
